# Supplementary material
Source: MDPI journal article supplement (https://www.mdpi.com/2073-4352/11/12/1588)
Supplement: s1 [file s1]

# Surface-Passivated CsPbBr<sub>3</sub> for Developing Efficient and Stable Perovskite Photovoltaics

Hyeon Ju Tak <sup>1,2†</sup>, Ji Hyeon Lee <sup>1†</sup>, Seunghwan Bae <sup>2,\*</sup> and Jea Woong Jo <sup>1,\*</sup>

<sup>1</sup> Department of Energy and Materials Engineering and Research Center for Photoenergy Harvesting & Conversion Technology (PHCT), Dongguk University, Seoul 04620, Korea; thj159@dongguk.edu (H.J.T.); jihyeonlee0089@dongguk.edu (J.H.L.)

<sup>2</sup> Green and Sustainable Materials R&D Department, Korea Institute of Industrial Technology (KITECH), Cheonan-si, Chungcheongnam-do 31056, Korea

\* Correspondence: shbae@kitech.re.kr (S.B.); whwp78@dongguk.edu (J.W.J.)

† These authors contributed equally to this work.

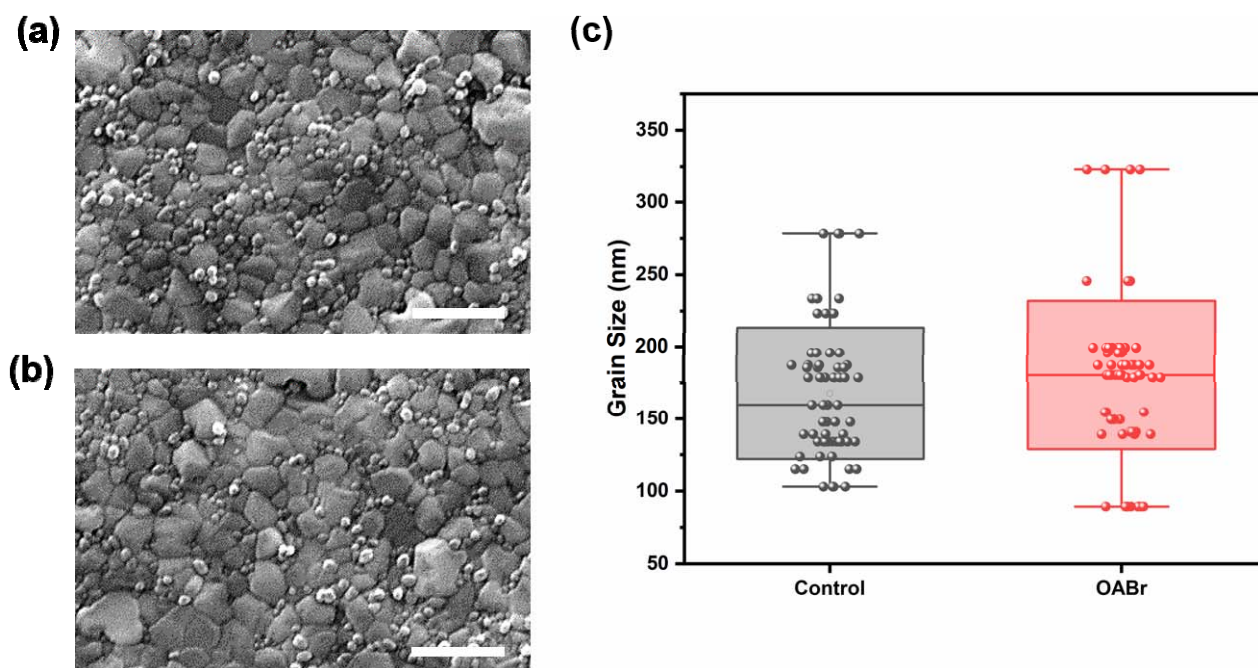

**Figure S1.** Top view SEM images of (a) control and (b) OABr-treated CsPbBr<sub>3</sub> films. The scale bar is 500 nm. (c) Grain size distribution obtained from SEM images.

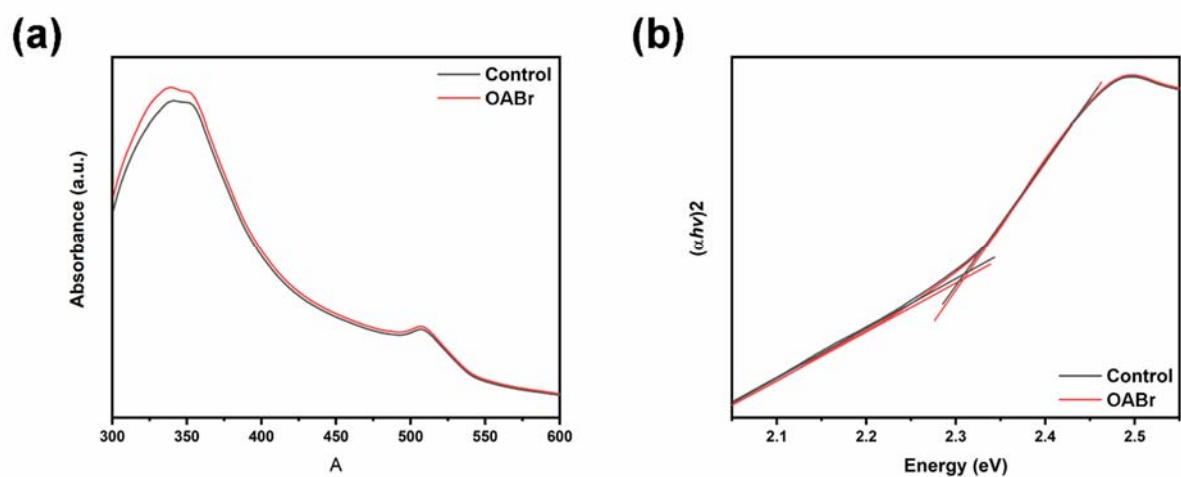

Figure S2. (a) UV-Vis spectra of CsPbBr<sub>3</sub> films on glass substrates and (b) its corresponding Tauc plot.

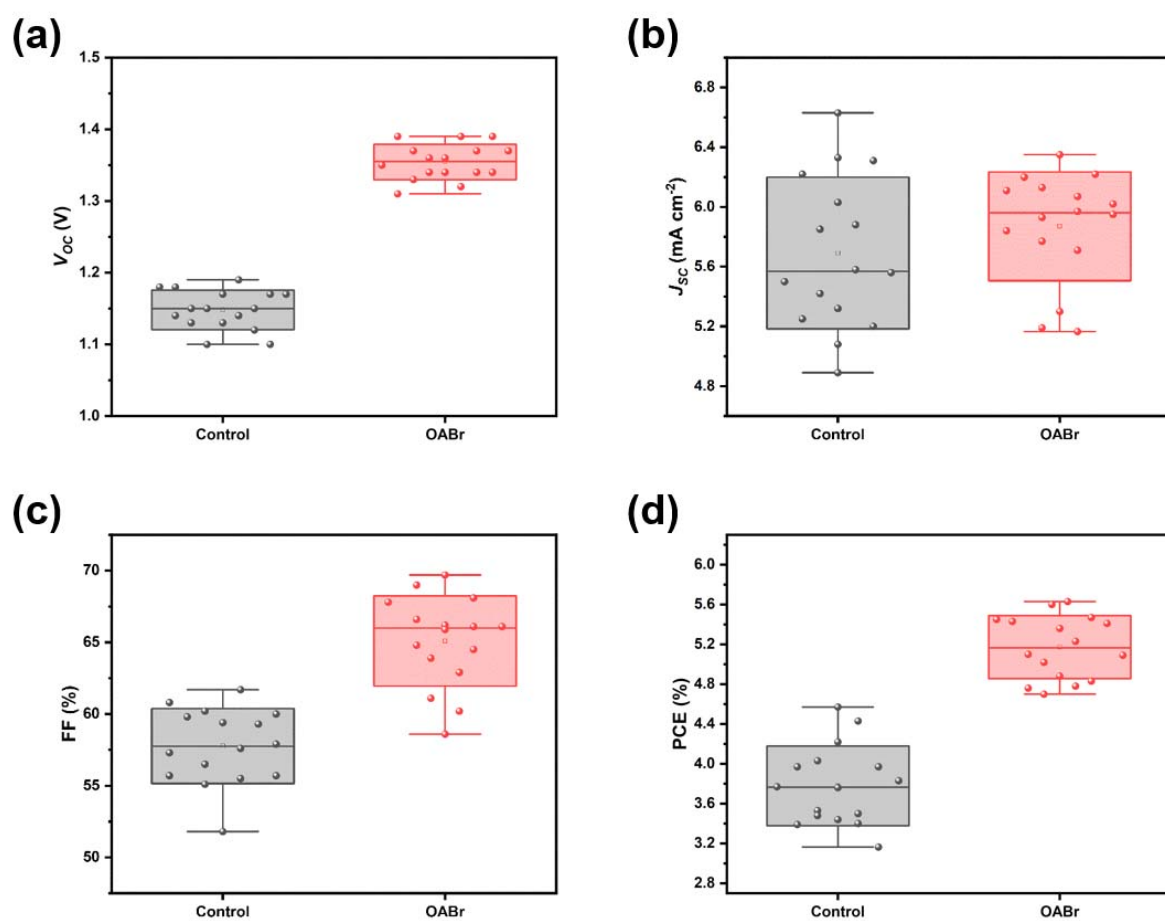

Figure S3. Detailed distribution data of (a)  $V_{oc}$ , (b)  $J_{sc}$ , (c) FF and (d) PCE for control and OABr-treated CsPbBr<sub>3</sub> PPVs.

**Table S1.** Photovoltaic parameters of CsPbBr<sub>3</sub> PPVs with and without OABr surface treatment.

|         |         | V <sub>oc</sub> (V) | J <sub>sc</sub> (mA cm <sup>-2</sup> ) | FF (%) | PCE (%) | PCE <sub>avg</sub> (%) |
|---------|---------|---------------------|----------------------------------------|--------|---------|------------------------|
| Control | Reverse | 1.17                | 6.33                                   | 61.7   | 4.57    | 4.12                   |
|         | Forward | 1.08                | 6.30                                   | 54.0   | 3.67    |                        |
| OABr    | Reverse | 1.34                | 6.35                                   | 66.2   | 5.63    | 5.44                   |
|         | Forward | 1.28                | 6.33                                   | 64.8   | 5.25    |                        |

**Table S2.** Photovoltaic parameters of reported CsPbBr<sub>3</sub> PPVs.

| Structure                                                                          | Method | V <sub>oc</sub> (V) | J <sub>sc</sub> (mA cm <sup>-2</sup> ) | FF (%) | PCE (%) | Ref.      |
|------------------------------------------------------------------------------------|--------|---------------------|----------------------------------------|--------|---------|-----------|
| FTO / c-TiO <sub>2</sub> / m-TiO <sub>2</sub> / CsPbBr <sub>3</sub> + PEG / Carbon | 1-Step | 1.41                | 7.56                                   | 73     | 7.8     | S1        |
| FTO / c-TiO <sub>2</sub> / m-TiO <sub>2</sub> / CsPbBr <sub>3</sub> / Carbon       | 1-Step | 1.22                | 7.40                                   | 81.4   | 7.37    | S2        |
| FTO / CsPbBr <sub>3</sub> / Carbon                                                 | 2-Step | 1.05                | 4.64                                   | 48.2   | 2.35    | S3        |
| FTO / TiO <sub>2</sub> / CsPbBr <sub>3</sub> / CuPc / Carbon                       | 2-Step | 1.26                | 6.62                                   | 74.4   | 6.21    | S4        |
| FTO / TiO <sub>2</sub> / CsPbBr <sub>3</sub> / P3HT / Carbon                       | 2-Step | 1.36                | 7.02                                   | 68     | 6.49    | S5        |
| FTO / TiO <sub>2</sub> / CsPbBr <sub>3</sub> / Carbon                              | 2-Step | 1.24                | 7.4                                    | 73     | 6.7     | S6        |
| FTO / TiO <sub>2</sub> / CsPbBr <sub>3</sub> / Carbon                              | 2-Step | 1.37                | 7.66                                   | 82.2   | 8.63    | S7        |
| FTO / TiO <sub>2</sub> / CsPbBr <sub>3</sub> / Carbon                              | 2-Step | 1.458               | 8.12                                   | 82.1   | 9.72    | S8        |
| FTO / TiO <sub>2</sub> / CsPbBr <sub>3</sub> / P3HT / ZnPC / Carbon                | 2-Step | 1.578               | 7.652                                  | 83.06  | 10.03   | S9        |
| FTO / c-TiO <sub>2</sub> / m-TiO <sub>2</sub> / CsPbBr <sub>3</sub> / Carbon       | 1-Step | 1.34                | 6.35                                   | 66.2   | 5.63    | This Work |

## References

- S1 Y, Ren.; N, Zhang.; Z, Arain.; M, Mateen.; J, Chen.; Y, Sun.; Z, Li. Polymer-induced lattice expansion leads to all-inorganic CsPbBr<sub>3</sub> perovskite solar cells with reduced trap density, *J. Power Sources*. **2020**, *475*, 228676.
- S2 D, Huang.; P, Xie.; Z, Pan.; H, Rao.; X, Zhong. One-step solution deposition of CsPbBr<sub>3</sub> based on precursor engineering for efficient all-inorganic perovskite solar cells, *J. Mater. Chem. A*. **2019**, *7*, 22420–22428.
- S3 J, Duan.; Y, Zhao.; B, He.; Q, Tang. Simplified Perovskite Solar Cell with 4.1% Efficiency Employing Inorganic CsPbBr<sub>3</sub> as Light Absorber. *Small*. **2018**, *14*, 1704443.
- S4 Z, Liu.; B, Sun.; X, Liu.; J, Han.; H, Ye.; T, Shi.; Z, Tang.; G, Liao. Efficient Carbon-Based CsPbBr<sub>3</sub> Inorganic Perovskite Solar Cells by Using Cu-Phthalocyanine as Hole Transport Material. *Nano-Micro Lett.* **2018**, *10*, 34.
- S5 G, Wang.; W, Dong.; A, Gurung.; K, Chen.; F, Wu.; Q, He.; R, Pathak.; Q, Qiao. Improving photovoltaic performance of carbon-based CsPbBr<sub>3</sub> perovskite solar cells by interfacial engineering using P3HT interlayer. *J. Power Sources*. **2019**, *432*, 48.
- S6 J, Liang.; C, Wang.; Y, Wang.; Z, Xu.; Z, Lu.; Y, Ma.; H, Zhu.; Y, Hu.; C, Xiao.; X, Yi.; G, Zhu.; H, Lv.; L, Ma.; T, Chen.; Z, Tie.; Z, Jin.; J, Liu. All-Inorganic Perovskite Solar Cells. *J. Am. Chem. Soc.* **2016**, *138*, 15829–15832.
- S7 H, Guo.; Y, Pei.; J, Zhang.; C, Cai.; K, Zhou.; Y, Zhu. Doping with SnBr<sub>2</sub> in CsPbBr<sub>3</sub> to enhance the efficiency of all-inorganic perovskite solar cells. *J. Mater. Chem. C*. **2019**, *7*, 11234–11243.
- S8 J, Duan.; Y, Zhao.; B, He.; Q, Tang. High-Purity Inorganic Perovskite Films for Solar Cells with 9.72 % Efficiency. *Angew. Chem. Int. Ed.* **2018**, *57*, 3787.
- S9 Y, Liu.; B, He.; J, Duan.; Y, Zhao.; Y, Ding.; M, Tang.; H, Chen.; Q, Tang. Poly(3-hexylthiophene)/zinc phthalocyanine composites for advanced interface engineering of 10.03%-efficiency CsPbBr<sub>3</sub> perovskite solar cells. *J. Mater. Chem. A*. **2019**, *7*, 12635.
